# Supplementary material for: Quantifying the Role of Adverse Events in the Mortality Difference between First and Second-Generation Antipsychotics in Older Adults: Systematic Review and Meta-Synthesis
Source: PubMed Central journal article supplement (PMC4139353; doi:10.1371/journal.pone.0105376), 2014-08-20
Supplement: pone.0105376.s005.pdf [file pone.0105376.s005.pdf]

## Supporting Information S4. Proportion mediated model and source data

$$\text{Proportion mediated} = \sum_m P[Y=1|M=m] \times \{P[M=m|A=1] - P[M=m|A=0]\} \div \{P[Y=1|M=1] - P[Y=1|M=0]\}$$

**Table 1. Description and source data for components used to estimate the proportion mediated**

| Notation   | Description                                                                                                            | Data and population used to estimate                                                 |
|------------|------------------------------------------------------------------------------------------------------------------------|--------------------------------------------------------------------------------------|
| A          | Exposure: type of antipsychotic (0=SGA, 1=FGA)                                                                         | ---                                                                                  |
| M          | Mediator: medical event occurrence within 6 months after initiating antipsychotic therapy (0=does not occur, 1=occurs) | ---                                                                                  |
| Y          | Outcome: vital status at 6 months after initiating antipsychotic therapy (0=alive, 1=deceased)                         | ---                                                                                  |
| P[M=0 A=0] | 6-month medical event free survival among SGA users                                                                    | Studies based in retrospective claims data; SGA initiators with mean age over age 65 |
| P[M=1 A=0] | 6-month medical event risk among SGA users                                                                             | Studies based in retrospective claims data; SGA initiators with mean age over age 65 |
| P[M=0 A=1] | 6-month medical event free survival among FGA users                                                                    | Studies based in retrospective claims data; FGA initiators with mean age over age 65 |
| P[M=1 A=1] | 6-month medical event risk among FGA users                                                                             | Studies based in retrospective claims data; FGA initiators with mean age over age 65 |
| P[Y=1 M=0] | 6-month mortality for persons who do not develop the medical event                                                     | U.S. Census mortality estimates; adults over age 65                                  |
| P[Y=1 M=1] | 6-month mortality for persons who develop the medical event                                                            | Clinical samples and general population studies; adults over 65 where possible       |
| P[Y=1 A=0] | 6-month mortality among SGA users                                                                                      | Studies based in retrospective claims data; SGA initiators with mean age over age 65 |
| P[Y=1 A=1] | 6-month mortality among FGA users                                                                                      | Studies based in retrospective claims data; FGA initiators with mean age over age 65 |
